# Supplementary material for: Sustained SARS-CoV-2 nucleocapsid antibody levels in nonsevere COVID-19: a population-based study
Source: publisher site journal article supplement (doi:10.1515/cclm-2020-1347), 2020-11-19
Supplement: Supplementary file 1 [file j_cclm-2020-1347_suppl.docx]

**Supplemental Table 1:** Characteristics of the included patients.

|  |  | Median [IQR] |
| --- | --- | --- |
|  | n total  = 82 | Percentage (95% CI) |
| Sex (female) | 40 | 49% (38;59) |
| Age (years) |  | 39 [29;58] |
| Smoker | 8 | 10% (5;18) |
| Preexisting conditions | 17(a) | 23% (16;33) |
| **Clinical course** |  |  |
| Symptomatic (anamnesis) | 82 | 100% (96;100) |
| Length of symptoms (days) |  | 12 [9;17] b |
| Consulted general practitioner | 22 | 27% (18;37) |
| Emergency room consultation | 12 | 15% (9;24) |
| Hospitalization | 11 | 13% (8;22) |
| IMC or mechanic ventilation | - | - |
| Death | - | - |
| **Clinical symptoms** |  |  |
| Cough | 61 | 74% (64;83) |
| Dysgeusia | 46 | 56% (45;66) |
| Headache | 44 | 54% (43;64) |
| Fatigue | 44 | 54% (43;64) |
| Fever | 43 | 52% (42;63) |
| Rhinitis | 37 | 45% (35;56) |
| Anosmia | 36 | 44% (34;55) |
| Limb and joint pains | 35 | 43% (33;54) |
| Chest pain | 31 | 38% (28;49) |
| Weight loss | 31 | 38% (28;49) |
| Sore throat | 29 | 35% (26;46) |
| Shivering | 24 | 29% (21;40) |
| Dyspnea | 24 | 29% (21;40) |
| Diarrhea | 20 | 24% (16;35) |
| Feeling of illness | 20 | 24% (16;35) |
| Nausea | 13 | 16% (10;25) |
| Vomiting | 3 | 4% (1;10) |
| Total number of symptoms |  | 6 [4,8] |
|  |  |  |  |  |  |  |
| aHypertension (n=8); cardiovascular disease (n=5); airway or pulmonary disease (n=4); diabetes mellitus (n=2);  cerebrovascular disease (n=2); intestinal disease (n=1); cancer (n=1); thrombosis (n=1); 6 individuals had more than one preexisting condition | | | | | | |
| bLength of symptoms data for one case are missing  IQR,interquartile range; CI, confidence interval; IMC, intermediate care unit. | | | | | | |
